RESEARCH ARTICLE

# Awareness of knowledge and practice regarding physical activity: A population-based prospective, observational study among students in Nanjing, China

Fei Xu<sup>1,2</sup>\*, Xiaorong Wang<sup>3</sup>, Dandan Xiang<sup>2</sup>, Zhiyong Wang<sup>1</sup>, Qing Ye<sup>1</sup>, Robert S. Ware<sup>4</sup>\*

**1** Nanjing Municipal Center for Disease Control and Prevention, Nanjing, China, **2** Department of Epidemiology, Nanjing Medical University School of Public Health, Nanjing, China, **3** Nanjing Children's Hospital Affiliated to Nanjing Medical University, Nanjing, China, **4** Menzies Health Institute Queensland, Griffith University, Brisbane, Queensland, Australia

\* These authors contributed equally to this work.  
\* [frankxufe@163.com](mailto:frankxufe@163.com) (FX); [R.Ware@griffith.edu.au](mailto:R.Ware@griffith.edu.au) (RSW)

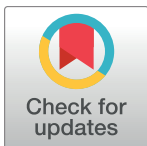

**OPEN ACCESS**

**Citation:** Xu F, Wang X, Xiang D, Wang Z, Ye Q, Ware RS (2017) Awareness of knowledge and practice regarding physical activity: A population-based prospective, observational study among students in Nanjing, China. PLoS ONE 12(6): e0179518. <https://doi.org/10.1371/journal.pone.0179518>

**Editor:** Harry Zhang, Old Dominion University, UNITED STATES

**Received:** December 10, 2016

**Accepted:** May 30, 2017

**Published:** June 16, 2017

**Copyright:** © 2017 Xu et al. This is an open access article distributed under the terms of the [Creative Commons Attribution License](https://creativecommons.org/licenses/by/4.0/), which permits unrestricted use, distribution, and reproduction in any medium, provided the original author and source are credited.

**Data Availability Statement:** All relevant data are within the manuscript.

**Funding:** The study was supported by Nanjing Medical Science and Technique Foundation (ZDX12019), China.

**Competing interests:** The authors have declared that no competing interests exist.

## Abstract

### Background

Physical activity (PA) promotion has proven effectiveness in preventing childhood obesity. Increasing children's health knowledge is the most frequently used approach in PA intervention programs targeting childhood obesity prevention. However, little is known about the specific association between the change in a child's knowledge awareness and their PA practice.

### Methods

A one-year follow-up study was conducted among primary and junior high school students in Nanjing, China. At baseline students' knowledge of healthy behavior, and their PA levels, were assessed. Students who were unaware of the association between PA and obesity were followed for one academic year. After nine-months their knowledge and PA levels were re-measured using the same validated questionnaire. Mixed effects regression models were used to estimate the relationship between awareness of knowledge about the link between PA and obesity and PA changes.

### Results

Of the 1899 students who were unaware of the association between PA and obesity at baseline, 1859 (follow-up rate = 97.9%) were successfully followed-up. After nine months 1318 (70.9%) participants had become aware of PA-obesity association. Compared to their counterparts who remained unaware, students who became aware of the PA-obesity association were more likely to increase both the frequency (odds ratio (OR) = 1.34, 95%CI = 1.09, 1.64) and duration (OR = 1.34, 95%CI = 1.09, 1.65) of PA, after adjusting for potentially confounding variables.

## Conclusion

Becoming aware of the known link between PA and obesity led to positive behavior modification regarding PA in this cohort of Chinese students. This is of particular importance that knowledge dissemination and health education may be a useful approach for population-based physical activity promotion aiming at childhood obesity prevention in China.

## Introduction

Childhood obesity is a major public health concern globally due to its continuously increasing prevalence worldwide, including within China [1–3]. Obesity in childhood not only has adverse effects on children's physical and mental health, but also predicts adulthood obesity and influences morbidity and mortality in adult life [4–6]. Physical inactivity is one of the major contributors to the alarming increase in childhood obesity [7–10]. As a consequence increased physical activity (PA) promotion is urgently needed for childhood obesity prevention.

Previous studies have documented that school-based PA interventions are effective in preventing obesity among school students in different cultural, social and educational environments [9–13]. Further understanding regarding the factors that influence PA engagement is of great importance, as they will allow tailoring of interventions to specific groups of school children. PA engagement has been shown to be influenced by a number of factors, including psychological (including awareness of knowledge), physiological, socio-cultural, socio-economic and environmental [14]. Among those factors, the association between awareness of knowledge regarding the known association between PA and body weight, and PA engagement has rarely been investigated. According to the 'Knowledge, Attitude and Practice' (KAP) model, people may modify their health and lifestyle behaviors if they have specific knowledge about how their behaviors can increase their disease risk [15]. Although knowledge of the benefits of PA has often been included as a component of PA promotion campaigns aimed at children, very few studies have investigated the influence of knowledge on children's PA practice [16–20].

We hypothesized that becoming aware of the knowledge that PA and body weight are correlated will be positively associated with PA engagement among school children. The aim of this study was to examine the association between change in knowledge and PA modification among school students in Nanjing, China.

## Methods

### Study design and participants

This prospective study was conducted over one academic school year among primary and junior high school students in Nanjing, China. Nanjing is a large city in eastern China with a population of approximately eight million, and is administratively divided into eight urban and five suburban districts. There were two questionnaire surveys implemented. The baseline survey was conducted in September 2013, and the follow-up survey in June 2014. Both surveys collected information on knowledge regarding health behaviors and chronic disease, and PA engagement.

Participants for the baseline survey were children in Grade 4 and Grade 7 (aged approximately 9 and 12 years respectively) from primary and junior high schools within the urban

districts of Nanjing. They were initially recruited as part of a large scale obesity prevention program through a multi-stage sampling approach. Four primary and two junior high schools were randomly selected from each of the eight urban districts (32 primary and 16 junior high schools in total). All 4th and 7th graders from the selected schools were invited to participate in the study, resulting in 10447 students who were eligible for the baseline survey.

There were 10091 students (96.6% of eligible) successfully recruited. Students had information on their demographic and social characteristics assessed via questionnaires administered by trained health professionals. The collected information included student's knowledge about PA and obesity, and the association between PA and obesity [21, 22]. Participant's anthropometric measurements were recorded by registered doctors within the classroom with the assistance of a class teacher. The question "Do you know that doing regular sufficient PA can help you keep your body losing weight and in good shape (prolonged physical inactivity can have you become obese)?" was used to assess whether participants knew about the influence of PA on obesity (PA-Obesity knowledge). Of the 10 091 respondents at baseline, 1899 (18.8%) students were identified as being unaware of PA-Obesity knowledge. These 1899 students were eligible to be included in the present study, and were re-approached at the follow-up survey. This study was approved by the academic and ethical committee of Nanjing Municipal Center for Disease Control and Prevention (Nanjing CDC). The signed informed consents for this study were obtained from parents/guardians and the schools prior to the baseline survey.

## Study variables

**Outcome variable.** Students' PA level was assessed with a validated item-specific questionnaire[23]. Students were asked to report, item by item, how many occasions (frequency) they engaged in after-school PA in the last 7 days, and the length of their engagement on each occasion (duration). This allowed the calculation of the total amount of time spent in PA in the past 7 days for each participant. This calculation was performed separately at baseline and follow-up. As well as being analyzed as interval variables, two dichotomous outcome measures were developed based on changes in PA frequency and total time (follow-up—baseline): (1) "PA frequency" (PA-F) and (2) "PA time" (PA-T). Both PA-F and PA-T were coded as binary variables (increased/did not increase).

**Exposure variable.** All students were asked the same question regarding their PA-Obesity knowledge at the baseline and follow-up surveys ("Do you know that doing regular sufficient PA can help you keep your body losing weight and in good shape (prolonged physical inactivity can have you become obese)?"). The question was asked before PA was assessed. Students who became aware of the association between PA and obesity during the study period were classified as "became aware", while those who didn't were classified as "remain unaware".

**Covariates.** Anthropometric measures were taken twice at each data collection point and the mean of the two readings was used. Weight and height were measured to the nearest 0.1 kilograms and to the nearest 0.01 meter, respectively. Body weight status (excess body weight) was assessed based on each student's body mass index (BMI) which was calculated as weight in kilograms divided by the square of the height in meters according to the age- and sex-specific recommendation for Chinese children by the Group of China Obesity Task Force [24]. The key demographic and social characteristics students' age, gender, grade, school, and parents' educational attainment (<high school education/ $\geq$ high school education) were collected via questionnaire.

## Data analysis

Summary statistics are presented as mean (standard deviation) for continuous variables and as frequency (percentage) for categorical variables. The associations between age, sex, grade, BMI

and overweight/obesity status and the binary variable follow-up status were investigated univariably using mixed-effects logistic regression models, with school included as the random effect. The associations between student characteristics and changes in knowledge awareness were investigated using mixed-effects logistic regression models, with school included as the random effect. The associations between change in knowledge awareness (became aware/ remained unaware) and PA modification were examined using mixed-effects linear regression models, with change in PA-F and PA-T as the outcome variables and school included as a random effect. Associations were investigated overall, and after stratification for grade and sex. Effect estimates are presented as mean difference (MD) and 95% confidence interval (CI). The association between change in knowledge awareness (became aware/remained unaware) and the binary outcomes increase in PA-F (yes/no) and increase in PA-T (yes/no) was examined using mixed effects logistic regression with school included as a random effect. This association was first investigated univariably, and then in multivariable models with students' age, grade, gender, overweight/obesity and parental education included as covariables. In all mixed-effects models school was included as a random effect to account for potential school-level clustering effects. Effects estimates from logistic regression models are presented as odds ratio (OR) and 95%CI. All analyses were conducted using SAS Version 9.4 software (SAS Institute, Cary, NC).

### Results

Of the 1899 students who were not aware of the association between PA and obesity at baseline, 1859 (97.9%) were successfully followed-up at the end of the academic year. There was no significant differences between those lost and followed in terms of age, gender, grade, and body weight status (Table 1). At study completion, 1318 (70.9%) participants had become aware of PA-obesity knowledge while 541 (29.1%) remained unaware. Table 2 presents the association between participants' characteristics and PA-obesity knowledge at study end. Participants were more likely to become aware of the knowledge if they were older, and heavier at baseline.

The associations between change in knowledge awareness and PA-F and PA-T at study end are displayed in Table 3. Compared to their counterparts who remained unaware of the link between PA and obesity at study end, these students who became aware significantly increased both their overall PA-F (MD = 2.5 sessions/week; 95%CI = 0.6, 4.5; p<0.01) and their PA-T

**Table 1. Comparison of selected baseline characteristics between those lost and followed-up.**

| Characteristic          | Lost (n = 40) | Follow-up (n = 1859) | P-value <sup>a</sup> |
|-------------------------|---------------|----------------------|----------------------|
| Mean age (SD)           | 10.53±1.54    | 10.61±1.56           | 0.89                 |
| BMI(kg/m <sup>2</sup> ) | 20.49±4.15    | 18.53±3.64           | 0.12                 |
| Grade (%)               |               |                      |                      |
| 4th                     | 21(52.5)      | 891(47.9)            | 0.80                 |
| 7th                     | 19(47.5)      | 968(52.1)            |                      |
| Gender(%)               |               |                      |                      |
| Boys                    | 21(52.5)      | 962(51.7)            | 0.97                 |
| Girls                   | 19(47.5)      | 897(48.3)            |                      |
| Overweight/obesity (%)  |               |                      |                      |
| No                      | 23(57.5)      | 1401(75.4)           | 0.24                 |
| Yes                     | 17(42.5)      | 458(24.6)            |                      |

<sup>a</sup> Estimated based on univariate mixed-effects logistic regression models with school included as the random effect.

<https://doi.org/10.1371/journal.pone.0179518.t001>

**Table 2. Selected baseline characteristics of 1859 participants by end-point status of knowledge in Nanjing, China.**

| Characteristic          | Overall (n = 1859) | Changes in knowledge awareness at follow-up survey |                          | OR(95%CI) <sup>a</sup> | P-value <sup>a</sup> |
|-------------------------|--------------------|----------------------------------------------------|--------------------------|------------------------|----------------------|
|                         |                    | Become aware (n = 1318)                            | Remain unaware (n = 541) |                        |                      |
| Mean age (SD)           | 10.61±1.56         | 10.51 ± 1.56                                       | 10.85±1.54               | 0.88(0.81,0.95)        | <0.01                |
| BMI(kg/m <sup>2</sup> ) | 18.53±3.64         | 18.64±3.67                                         | 18.25±3.54               | 1.04(1.01,1.07)        | <0.01                |
| Grade(%)                |                    |                                                    |                          |                        |                      |
| 4th                     | 891(47.9)          | 680(51.6)                                          | 211(39.0)                | 1                      | <0.01                |
| 7th                     | 968(52.1)          | 638(48.4)                                          | 330(61.0)                | 0.60(0.47,0.77)        |                      |
| Gender(%)               |                    |                                                    |                          |                        |                      |
| Boys                    | 962(51.7)          | 673(51.1)                                          | 289(53.4)                | 1                      | 0.27                 |
| Girls                   | 897(48.3)          | 645(48.9)                                          | 252(46.6)                | 1.12(0.92,1.37)        |                      |
| Parents' education(%)   |                    |                                                    |                          |                        |                      |
| <High school education  | 173(9.3)           | 127(9.6)                                           | 46(8.5)                  | 1                      | 0.51                 |
| ≥High school education  | 1686(90.7)         | 1191(90.4)                                         | 495(91.5)                | 0.89(0.62,1.27)        |                      |
| Overweight/obesity (%)  |                    |                                                    |                          |                        |                      |
| No                      | 1401(75.4)         | 971(73.7)                                          | 430(79.5)                | 1                      | <0.01                |
| Yes                     | 458(24.6)          | 347(26.3)                                          | 111(20.5)                | 1.40(1.09,1.79)        |                      |

<sup>a</sup> Estimated based on univariate mixed-effects logistic regression models with school included as the random effect.

<https://doi.org/10.1371/journal.pone.0179518.t002>

(MD = 12.7 minutes/day; 95%CI = 2.7, 22.8; p = 0.01). After stratification, statistically significant differences was observed for both PA-F and PA-T for both boys and the 7<sup>th</sup> graders, while a statistically significant difference was observed only for PA-F among the 4<sup>th</sup> graders.

Table 4 shows the association between change in knowledge awareness and the likelihood of increasing PA-F and PA-T. After adjustment for potential confounders, students who became aware of the PA-Obesity knowledge had 1.34 (95%CI = 1.09, 1.64) and 1.34 (95% CI = 1.09, 1.65) times greater odds of having their PA-F and PA-T improved relative to their counterparts who remained unaware of the knowledge at study completion. When data were separately analyzed by grade and gender, the associations remained statistically significant among the seventh graders for both PA-F and PA-T and among boys for PA-T and girls for PA-F only.

## Discussion

This population-based prospective study examined the relationship between change in knowledge and behavior modification regarding physical activity among urban school students in Nanjing, China, and found that for students who became aware of the association between physical activity and body weight became more physically active. This encouraging finding regarding knowledge and PA improvement was particularly prominent in boys and children in the 7<sup>th</sup> grade.

According to the KAP model, being aware of knowledge can help change related attitudes and lead to the corresponding behavior modification [15]. This model has been supported by previous health behavior-related studies, in topics such as smoking [25], eating [26] and weight control [27]. Our study provided further evidence to this model in this context of better knowledge understanding leading to better PA engagement.

There are very few population-based surveys that have explored the relationship between awareness of knowledge and PA enagement [16–20]. All previous studies have had a cross-sectional design and only three recruited children as participants [16–20]. Of the three studies conducted among children, two reported a positive relationship between awareness of

**Table 3. The associations between change in knowledge and modification of PA-F and PA-T at study end, overall and stratified by grade and gender among urban students in Nanjing, China.**

| Awareness at study end | Participants number | PA Frequency (per week) mean (SD) |                 |                      | Regression Coefficients (β and 95%CI) <sup>a</sup> |            |        | PA Time (min/day) mean (SD) |                  |                      | Regression Coefficients (β and 95%CI) <sup>a</sup> |             |      |
|------------------------|---------------------|-----------------------------------|-----------------|----------------------|----------------------------------------------------|------------|--------|-----------------------------|------------------|----------------------|----------------------------------------------------|-------------|------|
|                        |                     | Baseline                          | Follow-up       | Changes <sup>a</sup> | MD <sup>b</sup>                                    | 95%CI      | P      | Baseline                    | Follow-up        | Changes <sup>a</sup> | MD <sup>b</sup>                                    | 95%CI       | P    |
| Overall                | 1859                |                                   |                 |                      |                                                    |            |        |                             |                  |                      |                                                    |             |      |
| Not know yet           | 541                 | 18.10<br>±15.68                   | 19.59<br>±16.14 | 1.49<br>±17.63       | ref.                                               |            |        | 78.30±81.88                 | 72.49<br>±75.51  | -5.81±88.38          | ref.                                               |             |      |
| Become aware           | 1318                | 19.98<br>±18.09                   | 24.16<br>±17.17 | 4.18<br>±19.95       | 2.51                                               | 0.56,4.46  | <0.001 | 83.81±95.51                 | 90.71<br>±84.43  | 6.90<br>±103.87      | 12.73                                              | 2.66,22.79  | 0.01 |
| 4th                    | 891                 |                                   |                 |                      |                                                    |            |        |                             |                  |                      |                                                    |             |      |
| Not know yet           | 211                 | 21.99<br>±18.58                   | 23.68<br>±19.10 | 1.69<br>±21.19       | ref.                                               |            |        | 96.92±97.44                 | 90.92<br>±83.48  | -6.01<br>±104.59     | ref.                                               |             |      |
| Become aware           | 680                 | 23.84<br>±20.81                   | 28.05<br>±19.10 | 4.20<br>±23.54       | 2.36                                               | -1.21,5.93 | 0.005  | 102.75<br>±112.25           | 110.61<br>±94.23 | 7.86<br>±124.43      | 14.54                                              | -4.07,33.15 | 0.13 |
| 7th                    | 968                 |                                   |                 |                      |                                                    |            |        |                             |                  |                      |                                                    |             |      |
| Not know yet           | 330                 | 15.62<br>±12.93                   | 16.97<br>±13.31 | 1.35<br>±14.96       | Ref.                                               |            |        | 66.4±67.67                  | 60.71<br>±67.47  | -5.69±76.40          | ref.                                               |             |      |
| Become aware           | 638                 | 15.87<br>±13.50                   | 20.02<br>±13.70 | 4.15<br>±15.23       | 2.66                                               | 0.64,4.68  | 0.01   | 63.64±68.10                 | 69.51<br>±66.32  | 5.87±76.16           | 11.81                                              | 1.62,22.01  | 0.02 |
| Boys                   | 962                 |                                   |                 |                      |                                                    |            |        |                             |                  |                      |                                                    |             |      |
| Not know yet           | 289                 | 18.99<br>±15.96                   | 20.82<br>±17.41 | 1.83<br>±18.48       | ref.                                               |            |        | 85.33±88.77                 | 78.11<br>±76.66  | -7.22±90.07          | ref.                                               |             |      |
| Become aware           | 673                 | 20.57<br>±19.16                   | 25.36<br>±18.23 | 4.78<br>±21.68       | 2.94                                               | 0.03,5.86  | 0.048  | 88.30±97.88                 | 98.84<br>±85.41  | 10.54<br>±108.29     | 18.17                                              | 3.68,32.65  | 0.01 |
| Girls                  | 897                 |                                   |                 |                      |                                                    |            |        |                             |                  |                      |                                                    |             |      |
| Not know yet           | 252                 | 17.08<br>±15.32                   | 18.17<br>±14.45 | 1.09<br>±16.64       | ref.                                               |            |        | 70.25±72.51                 | 66.04<br>±73.79  | -4.20±86.54          | ref.                                               |             |      |
| Become aware           | 645                 | 19.37<br>±16.90                   | 22.92<br>±15.92 | 3.54<br>±17.95       | 2.36                                               | -0.23,4.94 | 0.07   | 79.13±92.82                 | 82.23±82.6       | 3.10±98.99           | 6.77                                               | -7.34,20.88 | 0.35 |

<sup>a</sup> Changes = Follow-up-Baseline.

<sup>b</sup> MD (mean difference) and 95%CI estimated multivariably with age, gender, grade, overweight/obesity, and parents' education included as co-variables and with school included as a random effect to account for school-level clustering effects.

<https://doi.org/10.1371/journal.pone.0179518.t003>

knowledge [18, 19] and PA engagement, while one documented no association between knowledge and PA [20]. In contrast with these previous studies, our study was a population-based prospective study with follow-up conducted 9 months after baseline, a large sample size (n = 1859), and both PA frequency and duration assessed using a validated questionnaire. The nature of our prospective study design allowed us to examine the association between changes in knowledge and modifications of PA engagement, adding a stronger and more robust layer of evidence to this research topic.

The proportion of Chinese adolescents who are physically inactive is higher than that in many other countries in the world [28]. This may be because Chinese students spend much more time in sitting for curriculum study purposes relative to their counterparts in Western countries [29], and consequently have less free-time to take part in PA after school. Even under this special cultural, social and educational context, the positive findings from our study strongly suggest that students who do not know of the link between PA and body weight will engage in more PA when they became aware of this knowledge. From the public health viewpoint, this is of particular importance and there are clear implications for population-based PA promotion campaigns and obesity prevention programs among students in China.

This study has several particular strengths. First, this is not only the first study to consider the relationship between awareness of knowledge and PA practice in China, but it has revealed

**Table 4. The relationship between awareness of knowledge and the likelihood of increase in PA-F and PA-T among urban students in Nanjing, China.**

| Awareness at study end | Participants number | PA frequency Increased |                      |                      | PA time Elevated |                      |                         |
|------------------------|---------------------|------------------------|----------------------|----------------------|------------------|----------------------|-------------------------|
|                        |                     | Yes                    | Model 1 <sup>a</sup> | Model 2 <sup>b</sup> | Yes              | Model 1 <sup>a</sup> | Model 2 <sup>b</sup>    |
|                        |                     | n (%)                  | OR(95% CI)           | OR(95% CI)           | n (%)            | OR(95% CI)           | OR(95% CI) <sup>a</sup> |
| Overall                | 1859                |                        |                      |                      |                  |                      |                         |
| Not know yet           | 541                 | 280(51.8)              | 1                    | 1                    | 252(46.6)        | 1                    | 1                       |
| Become aware           | 1318                | 801(60.8)              | 1.34(1.09,1.65)      | 1.34(1.09,1.64)      | 717(54.4)        | 1.33(1.08,1.63)      | 1.34(1.09,1.65)         |
| 4th                    | 891                 |                        |                      |                      |                  |                      |                         |
| Not know yet           | 211                 | 117(55.5)              | 1                    | 1                    | 107(50.7)        | 1                    | 1                       |
| Become aware           | 680                 | 408(60.0)              | 1.23(0.90,1.68)      | 1.25(0.91,1.72)      | 376(55.3)        | 1.21(0.88,1.66)      | 1.25(0.92,1.73)         |
| 7th                    | 968                 |                        |                      |                      |                  |                      |                         |
| Not know yet           | 330                 | 163(49.4)              | 1                    | 1                    | 145(43.9)        | 1                    | 1                       |
| Become aware           | 638                 | 393(61.6)              | 1.42(1.08,1.86)      | 1.40(1.07,1.85)      | 341(53.4)        | 1.41(1.07,1.85)      | 1.41(1.07,1.85)         |
| Boys                   | 962                 |                        |                      |                      |                  |                      |                         |
| Not know yet           | 289                 | 152(52.6)              | 1                    | 1                    | 134(46.4)        | 1                    | 1                       |
| Become aware           | 673                 | 409(60.8)              | 1.20(0.90,1.59)      | 1.22(0.92,1.62)      | 377(56.0)        | 1.44(1.09,1.92)      | 1.46(1.09,1.94)         |
| Girls                  | 897                 |                        |                      |                      |                  |                      |                         |
| Not know yet           | 252                 | 128(50.8)              | 1                    | 1                    | 118(46.8)        | 1                    | 1                       |
| Become aware           | 645                 | 392(60.8)              | 1.53(1.14,2.06)      | 1.53(1.13,2.05)      | 340(52.7)        | 1.24(0.92,1.67)      | 1.24(0.92,1.67)         |

<sup>a</sup> Model 1: OR and 95%CI estimated univariably with school included as a random effect to account for school-level clustering effects.

<sup>b</sup> Model 2: OR and 95%CI estimated multivariably with age, gender, grade, overweight/obesity, and parents' education included as co-variables and with school included as a random effect to account for school-level clustering effects

<https://doi.org/10.1371/journal.pone.0179518.t004>

a positive association between knowledge awareness and behavior modification among students, which added more evidences to support the KAP model. Second, the sample size was relatively large compared with previous studies, and sufficiently powered to identify significant between-group differences. And, third, the instrument used to gather information on PA was an item-specific questionnaire developed specially for Chinese students that shows good validity and reliability [24].

There are at least four study limitations that need to be mentioned. First, PA level was self-reported, which might produce recall bias [30], although the questionnaire used has demonstrated validity and reliability, and strict quality control approaches were introduced to all field surveys including having class teachers onsite when questionnaire surveys were conducted. Second, the association between PA and body weight is more complex than the simple question asked of students implies. Third, parents play important role for childrens' behavior, but only educational attainment was considered as a covariable in the analysis when adjusting for potential parental influence on childrens' behavior. Fourth, any extrapolation of the findings should be prudent as that a positive association between awareness of knowledge and improvement of PA engagement was examined from a local student population and changes in knowledge accounted for only 4.0% variation of changes in PA improvement.

In conclusion, knowledge awareness can lead to positive behavior modification regarding PA among Chinese students. It suggested that health education and knowledge dissemination are important in PA promotion campaigns among school students. This is of particular public health implication that knowledge dissemination and health education may be a useful approach for population-based physical activity promotion aiming at childhood obesity prevention in China. Future research should explore potential influence of knowledge on physical activity engagement and further consider sustainable knowledge education program of

physical activity for childhood obesity prevention under currently existing educational system in a specific society.

## Acknowledgments

Our special thanks go to study participants and the school personnel that participated in the data collection.

## Author Contributions

**Conceptualization:** FX.

**Data curation:** FX.

**Formal analysis:** FX DX QY.

**Funding acquisition:** FX.

**Investigation:** FX ZW QY.

**Methodology:** FX ZW.

**Project administration:** FX ZW.

**Resources:** FX ZW.

**Supervision:** FX RW.

**Validation:** FX ZW QY.

**Visualization:** FX XW DX ZW QY RW.

**Writing – original draft:** FX XW DX ZW QY RW.

**Writing – review & editing:** FX XW DX ZW QY RW.

## References

1. Ng M, Fleming T, Robinson M, Thomson B, Graetz N, Margono C, et al. Global, regional, and national prevalence of overweight and obesity in children and adults during 1980–2013: a systematic analysis for the Global Burden of Disease Study 2013. *The Lancet* 2014; 384(9945): 766–781.
2. Han JC, Lawlor DA, Kimm SY. Childhood obesity. *The Lancet* 2010; 375(9727): 1737–1748.
3. Ji CY, Chen T. Empirical Changes in the Prevalence of Overweight and Obesity among Chinese Students from 1985 to 2010 and Corresponding Preventive Strategies. *Biomedical and Environmental Sciences* 2013; 26(1): 1–12. <https://doi.org/10.3967/0895-3988.2013.01.001> PMID: 23294610
4. Singhal V, Schwenk WF, Kumar S. Evaluation and management of childhood and adolescent obesity. *Mayo Clin Proc* 2007; 82(10): 1258–1264. <https://doi.org/10.4065/82.10.1258> PMID: 17908531
5. Chen F, Wang Y, Shan X, Cheng H, Hou D, Zhao X, et al. Association between childhood obesity and metabolic syndrome: evidence from a large sample of Chinese children and adolescents. *PLoS One* 2012; 7(10): e47380. <https://doi.org/10.1371/journal.pone.0047380> PMID: 23082159
6. Whitaker RC, Wright JA, Pepe MS, Seidel KD, Dietz WH. Predicting obesity in young adulthood from childhood and parental obesity. *N Engl J Med* 1997; 337(13): 869–873. <https://doi.org/10.1056/NEJM199709253371301> PMID: 9302300
7. Shan XY, Xi B, Cheng H, Hou DQ, Wang Y, Mi J. Prevalence and behavioral risk factors of overweight and obesity among children aged 2–18 in Beijing, China. *Int J Pediatr Obes* 2010; 5(5): 383–389. <https://doi.org/10.3109/17477160903572001> PMID: 20233154
8. World Health Organization. Reasons for children and adolescents to become obese 2013 [cited 2016 May 30]. Available from: [http://www.who.int/dietphysicalactivity/childhood\\_why/en/index.html](http://www.who.int/dietphysicalactivity/childhood_why/en/index.html).
9. Pigeot I, Barba G, Chadigeorgiou C, de Henauw S, Kourides Y, Lissner L, et al. Prevalence and determinants of childhood overweight and obesity in European countries: pooled analysis of the existing



- surveys within the IDEFICS Consortium. *International journal of obesity* 2009; 33(10): 1103–1110. <https://doi.org/10.1038/ijo.2009.142> PMID: 19636314
10. Flynn MA, McNeil DA, Maloff B, Mutasingwa D, Wu M, Ford C, et al. Reducing obesity and related chronic disease risk in children and youth: a synthesis of evidence with 'best practice' recommendations. *Obesity reviews* 2006; 7 Suppl 1: 7–66.
  11. Wang Y, Cai L, Wu Y, Wilson RF, Weston C, Fawole O, et al. What childhood obesity prevention programmes work? A systematic review and meta-analysis. *Obesity reviews* 2015; 16(7): 547–565. <https://doi.org/10.1111/obr.12277> PMID: 25893796
  12. Wang Y, Tussing L, Odoms-Young A, Braunschweig C, Flay B, Hedeker D, et al. Obesity prevention in low socioeconomic status urban African-american adolescents: study design and preliminary findings of the HEALTH-KIDS Study. *European journal of clinical nutrition* 2006; 60(1): 92–103. <https://doi.org/10.1038/sj.ejcn.1602272> PMID: 16118646
  13. Wang Y, Wu Y, Wilson RF, Bleich S, Cheskin L, Weston C, et al. AHRQ Comparative Effectiveness Reviews. In: *Childhood Obesity Prevention Programs: Comparative Effectiveness Review and Meta-Analysis*. edn. Rockville (MD): Agency for Healthcare Research and Quality (US); 2013.
  14. Commission of the European Communities. *Green Paper: Promoting healthy diets and physical activity: a European dimension of the prevention of overweight, obesity, and chronic diseases*. Brussels: Commission of the European Communities, 2005.
  15. Ward MM, Vaughn TE, Uden-Holman T, Doebbeling BN, Clarke WR, Woolson RF. Physician knowledge, attitudes and practices regarding a widely implemented guideline. *J Eval Clin Pract* 2002; 8(2): 155–162. PMID: 12180364
  16. Roth M, Stamatakis E. Linking young people's knowledge of public health guidelines to physical activity levels in England. *Pediatr Exerc Sci*. 2010; 22:467–76. PMID: 20814041
  17. Plotnikoff RC, Lippke S, Johnson ST, Hugo K, Rodgers W, Spence JC. Awareness of Canada's Physical Activity Guide to Healthy Active Living in a large community sample. *Am J Health Promot*. 2011; 25: 294–7. <https://doi.org/10.4278/ajhp.090211-ARB-60> PMID: 21534830
  18. Borges TT, Hallal PC, da Silva IC, Mielke GI, Rombaldi AJ, Barros FC. Association Between Knowledge and Practice in the Field of Physical Activity and Health: A Population-Based Study. *J Phys Act Health*. 2015; 12: 1005–9. <https://doi.org/10.1123/jpah.2013-0534> PMID: 25153624
  19. Heinrich KM, Maddock J, Bauman A. Exploring the relationship between physical activity knowledge, health outcomes expectancies, and behavior. *J Phys Act Health*. 2011; 8: 404–9. PMID: 21487140
  20. Rutkowski EM, Connelly CD. Obesity risk knowledge and physical activity in families of adolescents. *Journal of pediatric nursing* 2011; 26: 51–57. <https://doi.org/10.1016/j.pedn.2009.12.069> PMID: 21256412
  21. Xu F, Ware RS, Tse LA, Wang Z, Hong X, Song A, et al. A school-based comprehensive lifestyle intervention among chinese kids against obesity (CLICK-Obesity): rationale, design and methodology of a randomized controlled trial in Nanjing city, China. *BMC Public Health* 2012; 12: 316. <https://doi.org/10.1186/1471-2458-12-316> PMID: 22545755
  22. Xu F, Ware RS, Leslie E, Tse LA, Wang Z, Li J, et al. Effectiveness of a Randomized Controlled Lifestyle Intervention to Prevent Obesity among Chinese Primary School Students: CLICK-Obesity Study. *PLoS One* 2015; 10(10): e0141421. <https://doi.org/10.1371/journal.pone.0141421> PMID: 26510135
  23. Chu W, Wang Z, Zhou H, Xu F. The reliability and validity of a physical activity questionnaire in Chinese children. *Chinese Journal of Disease Control & Prevention* 2014; 18(11): 1079–1082.
  24. Group of China Obesity Task Force. Body mass index for reference norm for screening over-weight and obesity in Chinese children and adolescents. *Chinese Journal of Epidemiology* 2004; 25(2): 97–102. PMID: 15132858
  25. Finney Rutten LJ, Augustson EM, Moser RP, Beckjord EB, Hesse BW. Smoking knowledge and behavior in the United States: sociodemographic, smoking status, and geographic patterns. *Nicotine & Tobacco Research* 2008; 10(10): 1559–70.
  26. Beydoun MA, Wang Y. Do nutrition knowledge and beliefs modify the association of socio-economic factors and diet quality among US adults? *Preventive medicine* 2008; 46(2): 145–153. <https://doi.org/10.1016/j.ypmed.2007.06.016> PMID: 17698186
  27. Nuss H, Freeland-Graves J, Clarke K, Klohe-Lehman D, Milani TJ. Greater nutrition knowledge is associated with lower 1-year postpartum weight retention in low-income women. *Journal of the American Dietetic Association* 2007; 107(10): 1801–1806. <https://doi.org/10.1016/j.jada.2007.07.010> PMID: 17904941
  28. Hallal PC, Andersen LB, Bull FC, Guthold R, Haskell W, Ekelund U. Global physical activity levels: surveillance progress, pitfalls, and prospects. *Lancet* 2012; 380(9838): 247–257. [https://doi.org/10.1016/S0140-6736\(12\)60646-1](https://doi.org/10.1016/S0140-6736(12)60646-1) PMID: 22818937

29. Yang XZ, Liu BC. Cross-sectional comparison of study burden among students in different countries. *Shanghai Education & Research* 2002; 4: 58–61.
30. Reilly JJ, Penpraze V, Hislop J, Davies G, Grant S, Paton JY. Objective measurement of physical activity and sedentary behaviour: review with new data. *Archives of disease in childhood* 2008; 93(7): 614–619. <https://doi.org/10.1136/adc.2007.133272> PMID: 18305072
